# Supplementary material
Source: PubMed Central journal article supplement (PMC3220454)
Supplement: supp_M111.287201_jbc.M111.287201-1.pdf [file supp_M111.287201_jbc.M111.287201-1.pdf]

**Supplementary Table 1:** Primers used in DNA manipulations

| <b>Protein</b>                  | <b>Primers</b> |                                       |
|---------------------------------|----------------|---------------------------------------|
| PEX5 $\Delta$ N110              | Fw             | - GAGCGCGCCATATGGCAGACTTGGCCTTGTCT    |
|                                 | Rv*            | - GCGTAATTAAGCTTGGCTGCAGGTC           |
| PEX5 $\Delta$ N147              | Fw             | - GAGCGCGCCATATGGTTACAGACCCCTTGTCTG   |
| PEX5 $\Delta$ N196              | Fw             | - GAGCGCGCCATATGACGGCCAGTGACTTTGTG    |
| PEX5 $\Delta$ N267              | Fw             | - GAGCGCGCCATATGTCTGCCCTTGATATGGA     |
| PEX5 $\Delta$ N290              | Fw             | - GAGCGCGCCATATGTTGCAGGCAGAGTTGGA     |
| PEX5 $\Delta$ N267-M7 ; PEX5-M7 | W308A          | Fw - GCTGAGGCCACCCGCTCTTTCTGACTATGAT  |
|                                 |                | Rv - ATCATAGTCAGAAAGAGCGGGGTGGCCTCAGC |
|                                 | Y312A          | Fw - CCGCTCTTTCTGACGCTGATGACCTTACG    |
|                                 |                | Rv - CGTAAGGTCATCAGCGTCAGAAAGAGCGG    |
| PEX5-M6,7**                     | W257A          | Fw - TACATCAGATGCCGCGGTTGACCAGTTCAC   |
|                                 |                | Rv - GTGAACTGGTCAACCGCGGCATCTGATGTA   |
|                                 | F261A          | Fw - CCGCGGTTGACCAGGCCACAAGACCAGTAA   |
|                                 |                | Rv - TTA CTGGTCTTGTGGCCTGGTCAACCGCGG  |
| PEX5 (Mus musculus)             | Fw             | - GCGAACTGCATATGGCAATGCGGGAGCTGG      |
|                                 | Rv             | - GCGGTGCTGACTCACTGGGGCAGGCCAAACAT    |
| Catalase                        | Fw             | - GGTCTAGAGCCACCATGGCTGACAGCC         |
|                                 | Rv             | - GGTACCCCTCACAGATTTGCCTTCT           |
| Cat $\Delta$ KANL               | Fw             | - ACTTGGCGGCAAGGGAGTAGGCAAATCTGTGA    |
|                                 | Rv             | - TCACAGATTTGCCTACTCCCTTGCCGCAAGT     |
| CatED                           | Fw             | - CGGCAAGGGAGGAGGACTAACTGTGAGGTACCGA  |
|                                 | Rv             | - TCGGTACCTCACAGTTAGTCCTCCTCCCTTGCCG  |

\* The same reverse primer was used for PEX5 $\Delta$ N110, PEX5 $\Delta$ N147, PEX5 $\Delta$ N196, PEX5 $\Delta$ N267 and PEX5 $\Delta$ N290

\*\* The plasmid encoding PEX5-M7 was used as the template for this mutagenesis
