# Supplementary material
Source: PubMed Central journal article supplement (PMC3220454)
Supplement: supp_M111.287201_jbc.M111.287201-2.pdf [file supp_M111.287201_jbc.M111.287201-2.pdf]

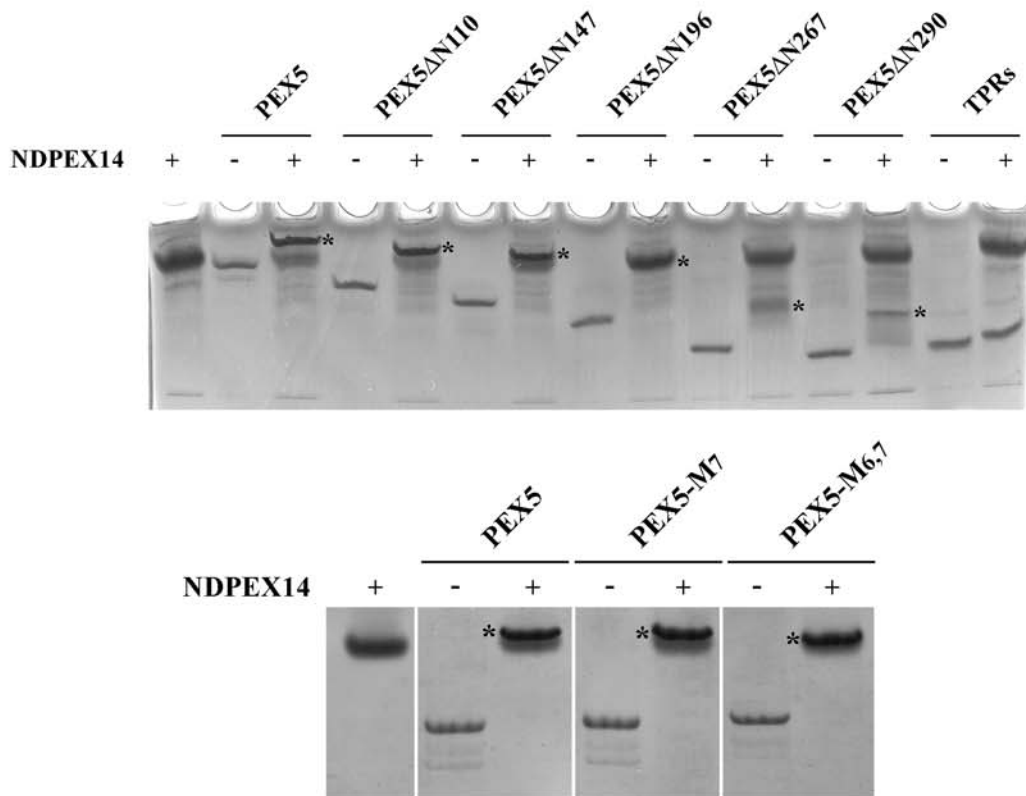

**Figure S1**

**Fig. S1 Native-PAGE analysis of recombinant PEX5 proteins.** Native-PAGE analysis of the indicated PEX5 proteins (3  $\mu$ g each) in the absence or presence of recombinant NDPEX14 (12  $\mu$ g per lane). The asterisks mark the complexes between the recombinant PEX5 proteins and NDPEX14. Coomassie blue-stained gels are shown
